# Supplementary material for: Synthesis, Phase Behavior and Computational Simulations of a Pyridyl-Based Liquid Crystal System
Source: MDPI journal article supplement (doi:10.3390/molecules26216416), 2021-10-24
Supplement: s1 [file s1]

## Supplementary Materials

### Synthesis, phase behavior and computational simulations of pyridyl based liquid crystal system

Fowzia S. Alamro <sup>1</sup>, Hoda A. Ahmed <sup>2,3,\*</sup>, Saheed A. Popoola <sup>4</sup>, and Asmaa Aboelnaga <sup>5</sup>

<sup>1</sup> Department of Chemistry, College of Science, Princess Nourah bint Abdulrahman University, Riyadh 11671, Saudi Arabia; fsalamro@pnu.edu.sa

<sup>2</sup> Department of Chemistry, Faculty of Science, Cairo University, Cairo 12613, Egypt

<sup>3</sup> Chemistry Department, College of Sciences, Yanbu, Taibah University, Yanbu 30799, Saudi Arabia

<sup>4</sup> Chemistry Department, Faculty of Science, Islamic University of Madinah, Al-Madinah Al-Munawwarah 42351, Saudi Arabia; abiodun@iu.edu.sa

<sup>5</sup> Department of Chemistry, Faculty of Women for Arts, Science and Education, Egypt, Ain Shams University, Cairo, P.O. Box 11566, Egypt; asmaa\_aboelnaga77@yahoo.com

\* Correspondence: (H.A.A.) ahoda@sci.cu.edu.eg

#### 1. Materials

Ethyl 4-aminobenzoate and nicotinaldehyde obtained from Sigma-Aldrich (Germany). 4-hydroxyaniline and 1-bromoalkanes, were obtained from Merck (Germany). *N,N'*-Dicyclohexylcarbodiimide (DCC) and 4-dimethylaminopyridine (DMAP) were purchased from Aldrich (Milwaukee, WI, USA). All chemicals were used without further purification. All the solvents used such as dichloromethane, ethanol, and methanol were of pure grade and purchased Aldrich.

#### 2. Preparation of (E)-4-((pyridin-3-ylmethylene)amino)phenol (**A**)

(0.5 g, 4.1 mmol) of nicotinaldehyde mixed with equimolar equivalents of the and 4-hydroxyaniline (0.45 g, 4.1 mmol) in EtOH (10 ml) and refluxed for 2 h. The mixture was cooled to room temperature and filtered. The obtained solid was washed with cold EtOH and recrystallized twice from hot EtOH to give pure compounds, as indicated by thin-layer chromatography (TLC) analysis; mp = 204.0°C.

#### 3. Preparation of (E)-4-((pyridin-3-ylmethylene)amino)phenyl 4-(alkoxy) benzoate **Tn**

Molar equivalents of the (E)-4-((pyridin-3-ylmethylene)amino)phenol (**A**) and 4-(alkoxy)benzoic acid (0.01 mol each) were dissolved in 25 ml dry methylene chloride (DCM). To the resulting mixture, DCC (0.02 mol) and few crystals of 4-(dimethylamino) pyridine (DMAP), as catalyst, were added and the solution left to stand for 72 h at room temperature with

continuous stirring. The solid was separated then filtered off and the solution evaporated. The solid residue obtained was recrystallized twice from acetic acid and twice from ethanol to give TLC pure products. The purity of the prepared samples was checked with TLC using TLC sheets coated with silica gel (E Merck), and CH<sub>2</sub>Cl<sub>2</sub>/CHOH (9:1) as eluent, whereby only one spot was detected by a UV-lamp.

#### 4. Characterization

IR spectra of all investigated compounds **In**<sub>a-d</sub> were measured by Perkin-Elmer B25 (Perkin-Elmer, Inc., Shelton, CT USA) spectrophotometer. <sup>1</sup>H NMR spectra were performed using a Varian EM 350L 300 MHz spectrometer (Oxford, UK) using CDCl<sub>3</sub> as solvent the chemical shift values recorded as  $\delta$  (ppm units). Elemental analyses for final products were carried out on Thermo Scientific Flash 2000 CHS/O Elemental Analyzer (Milan, Italy). Mass spectra were performed with GCMS-QP1000EX Mass spectrometer (Shimadzu, Japan) and microanalyses with a Perkin-Elmer Series II 2400-CHN Analyser (Shelton, CT USA). The UV-vis absorption spectra were measured on a UV-1800 SHIMADZU (Japan) spectrophotometer in dichloromethane solutions.

Differential Scanning Calorimeter, TA instrument Co. Q20 (DSC; USA), was used for calorimetric measurements. The melting point and enthalpy of indium and lead was used for DSC calibration. Aluminum pans and 2–3 mg sample amounts were used for DSC measurements investigation. 30 ml/min nitrogen gas inert atmosphere and 10°C/min heating rate were selected for all measurements and all transitions were recorded from the heating scan. The texture of the mesophases was identified by a polarized light microscope (POM, Wild, Germany) with Mettler FP82HT hot stage. The transitions from liquid crystal phase to isotropic liquid under POM for all prepared derivatives were in all cases quite sharp, and there was no indication whatsoever that any of the transitions took place over a range of temperature.

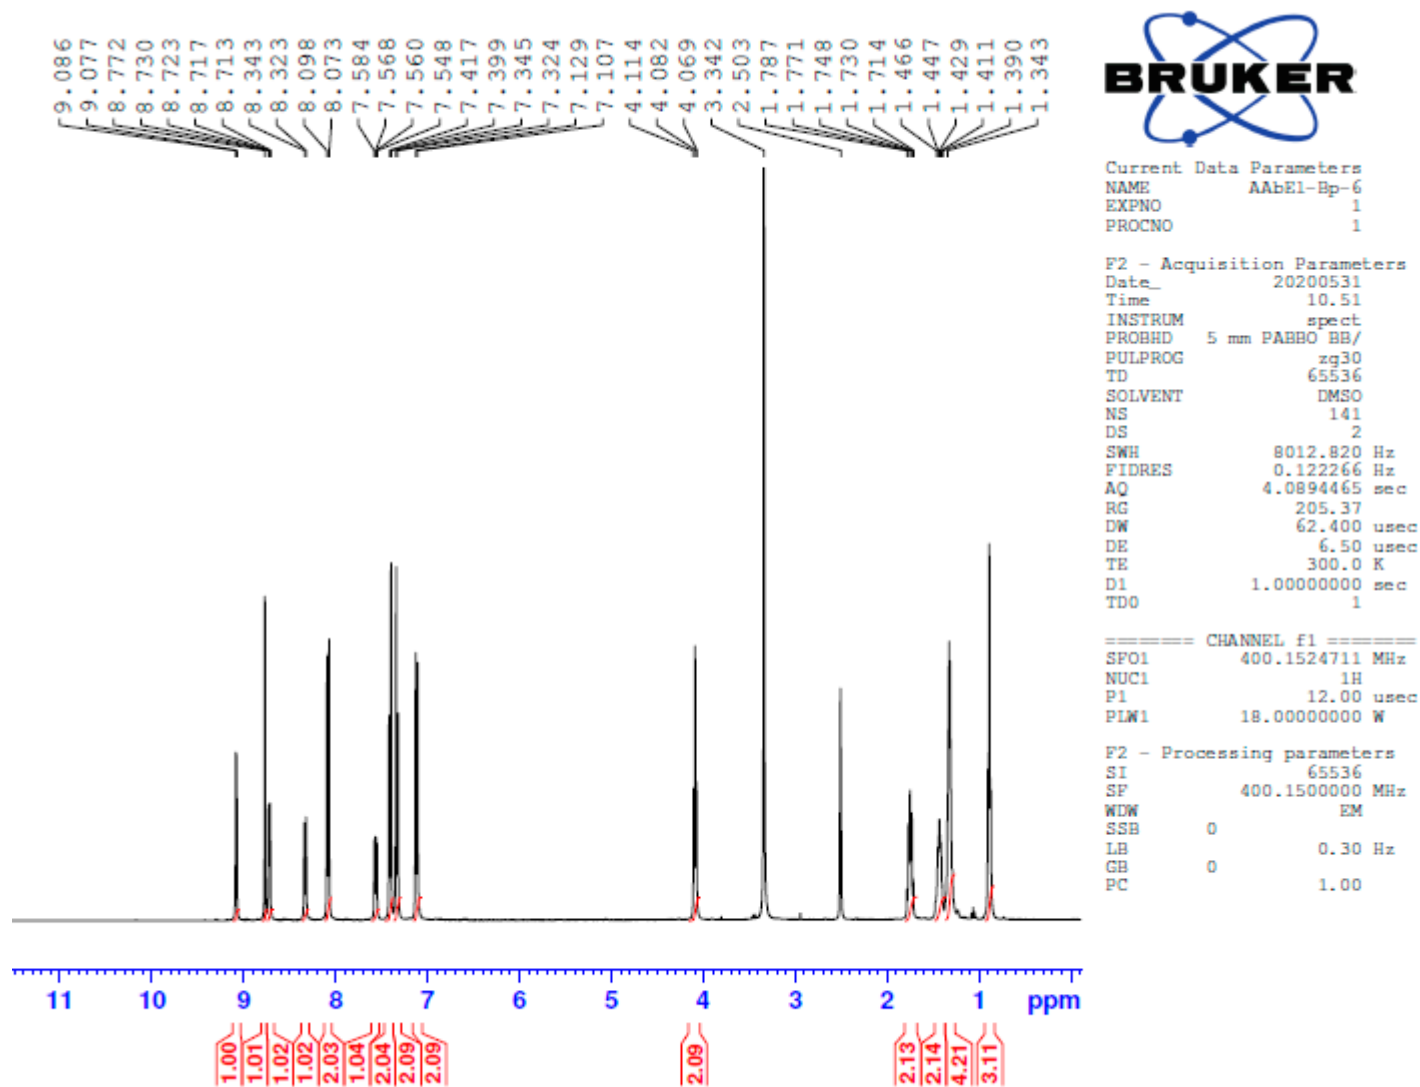

Figure S1. <sup>1</sup>H-NMR spectrum of T6

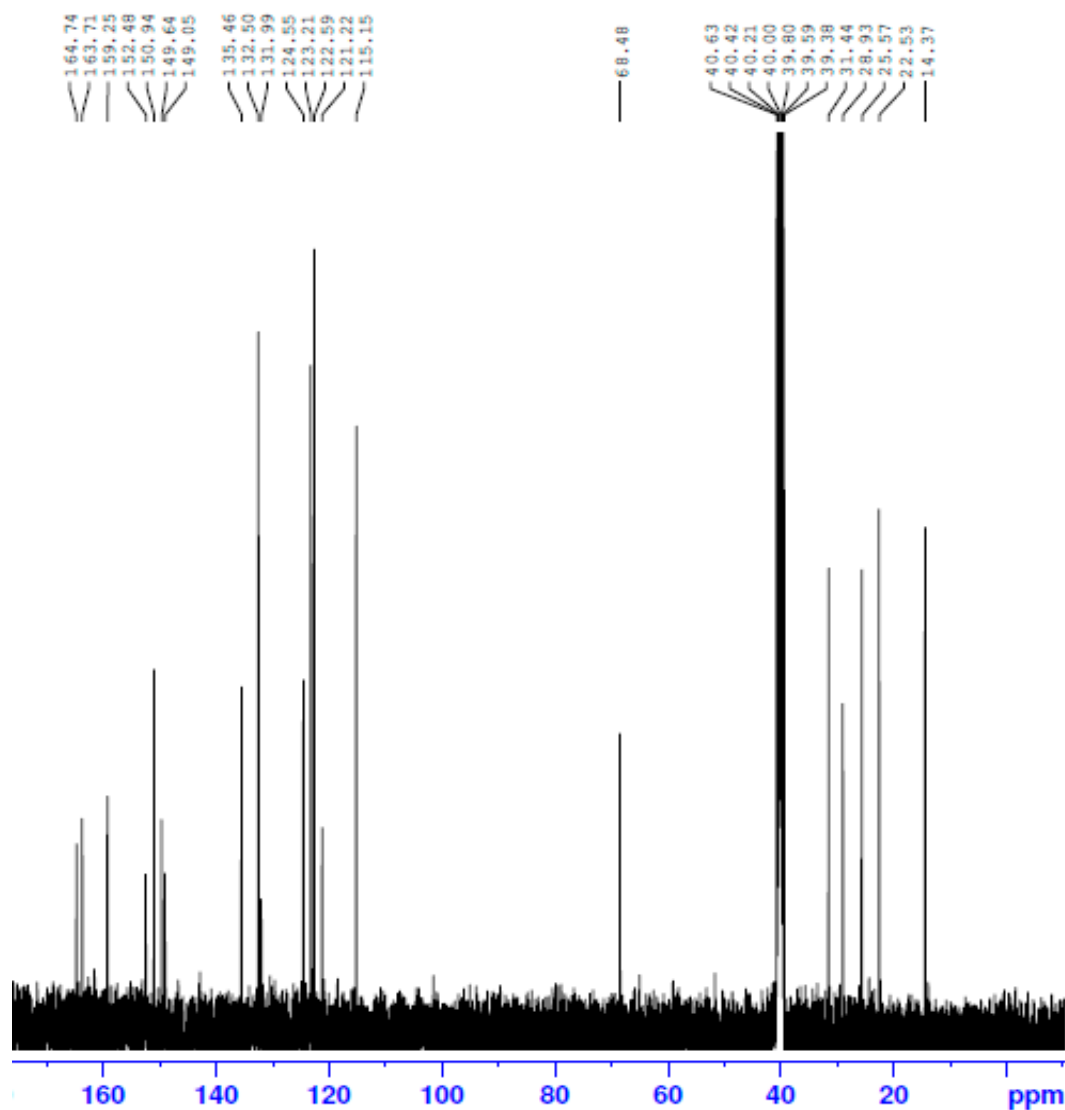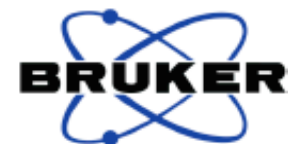

Current Data Parameters  
 NAME AAbE1-Bp-6  
 EXPNO 2  
 PROCNO 1

F2 - Acquisition Parameters  
 Date\_ 20200531  
 Time 12.44  
 INSTRUM spect  
 PROBHD 5 mm PABBO BB/  
 PULPROG zgpg30  
 TD 65536  
 SOLVENT DMSO  
 NS 1471  
 DS 4  
 SWH 24038.461 Hz  
 FIDRES 0.366798 Hz  
 AQ 1.3631488 sec  
 RG 205.37  
 DW 20.800 usec  
 DE 6.50 usec  
 TE 300.0 K  
 D1 2.00000000 sec  
 D11 0.03000000 sec  
 TD0 1

===== CHANNEL f1 =====  
 SFO1 100.6278588 MHz  
 NUC1 13C  
 P1 10.00 usec  
 PLW1 47.00000000 W

===== CHANNEL f2 =====  
 SFO2 400.1516006 MHz  
 NUC2 1H  
 CPDPRG[2] waltz16  
 PCPD2 90.00 usec  
 PLW2 18.00000000 W  
 PLW12 0.34722000 W  
 PLW13 0.28125000 W

F2 - Processing parameters  
 SI 32768  
 SF 100.6177975 MHz  
 WDW EM  
 SSB 0  
 LB 1.00 Hz  
 GB 0  
 PC 1.40

Figure S2.  $^{13}\text{C}$ -NMR spectrum of T6

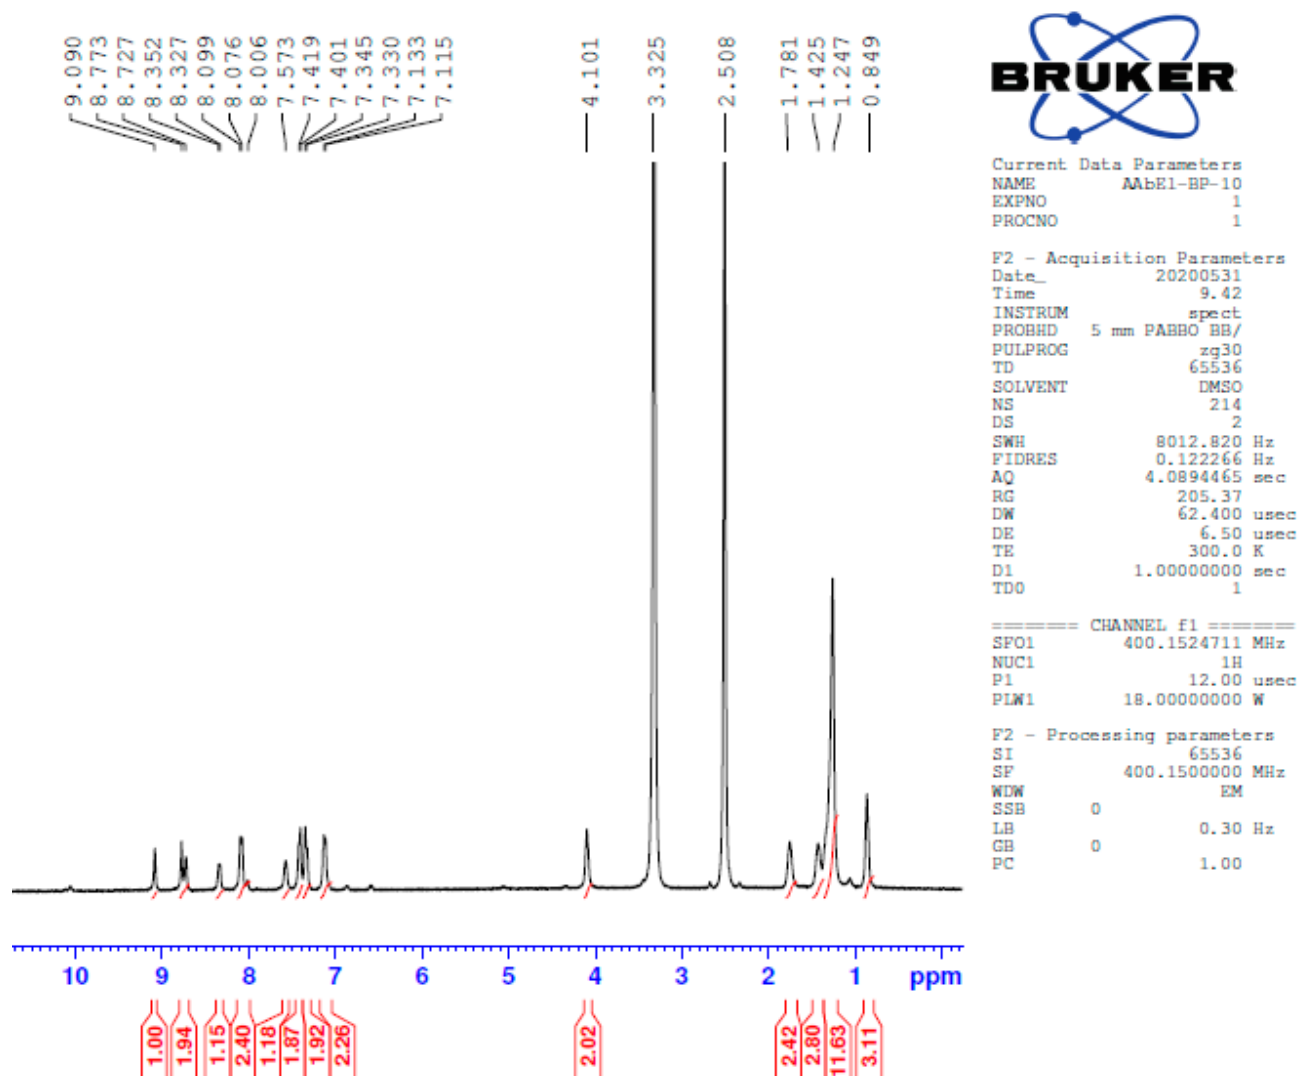

**Figure S3.  $^1\text{H}$ -NMR spectrum of T10**

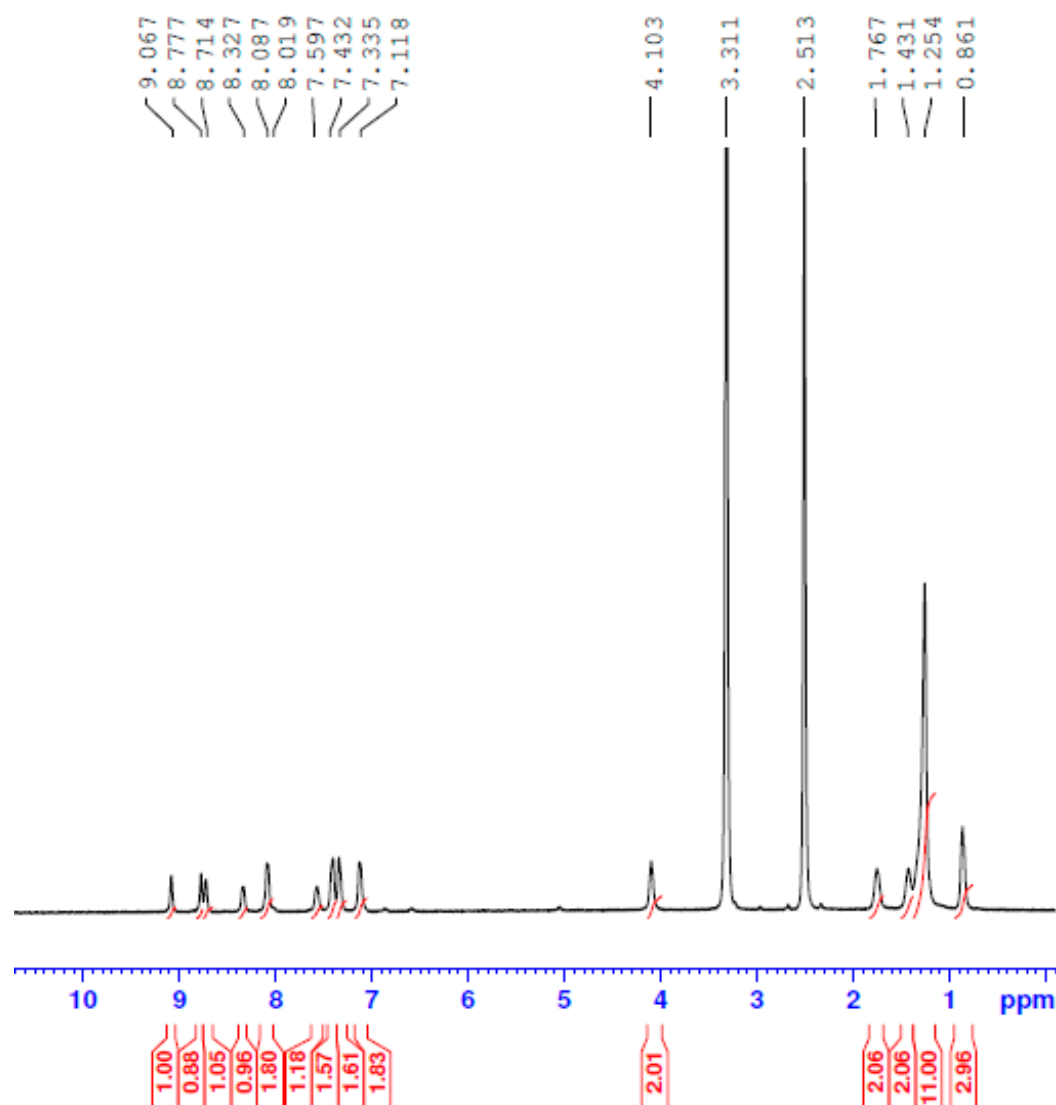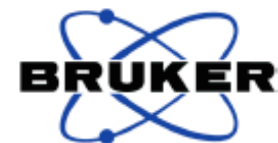

Current Data Parameters  
 NAME AAbE1-Bp-12  
 EXPNO 1  
 PROCNO 1

F2 - Acquisition Parameters  
 Date\_ 20200531  
 Time 11.15  
 INSTRUM spect  
 PROBHD 5 mm PABBO BB/  
 PULPROG zg30  
 TD 65536  
 SOLVENT DMSO  
 NS 252  
 DS 2  
 SWH 8012.820 Hz  
 FIDRES 0.122266 Hz  
 AQ 4.0894465 sec  
 RG 205.37  
 DW 62.400 usec  
 DE 6.50 usec  
 TE 300.0 K  
 D1 1.00000000 sec  
 TD0 1

===== CHANNEL f1 =====  
 SFO1 400.1524711 MHz  
 NUC1 1H  
 P1 12.00 usec  
 PLW1 18.00000000 W

F2 - Processing parameters  
 SI 65536  
 SF 400.1500000 MHz  
 WDW EM  
 SSB 0  
 LB 0.30 Hz  
 GB 0  
 PC 1.00

Figure S4.  $^1\text{H}$ -NMR spectrum of T12

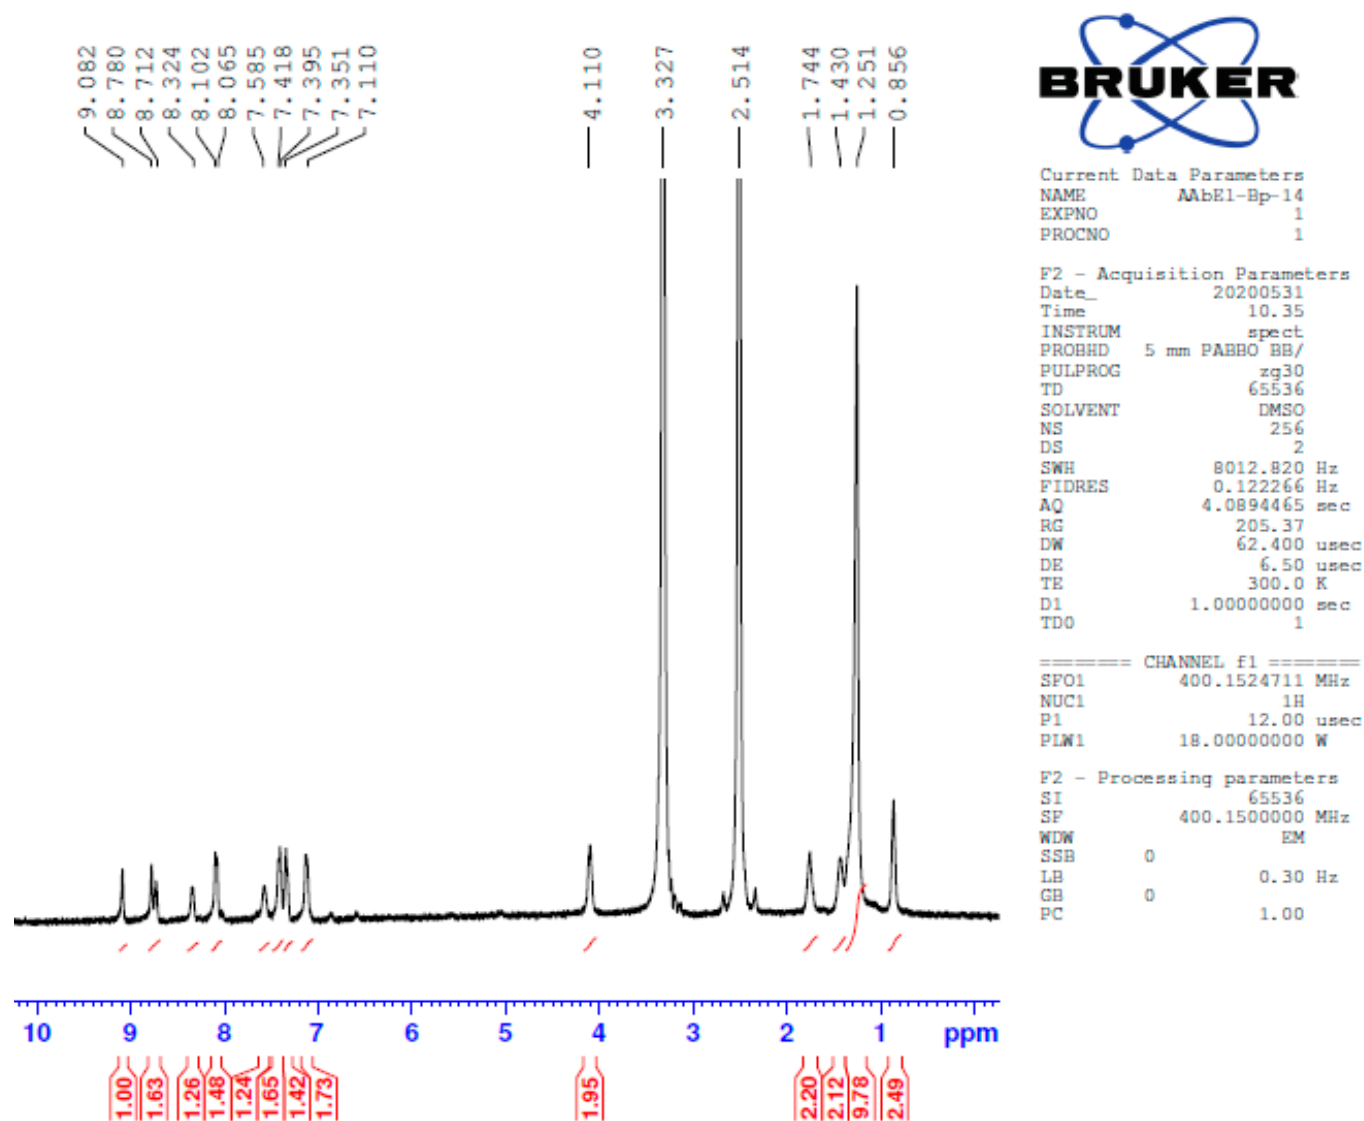



Figure S5.  $^1\text{H-NMR}$  spectrum of T14

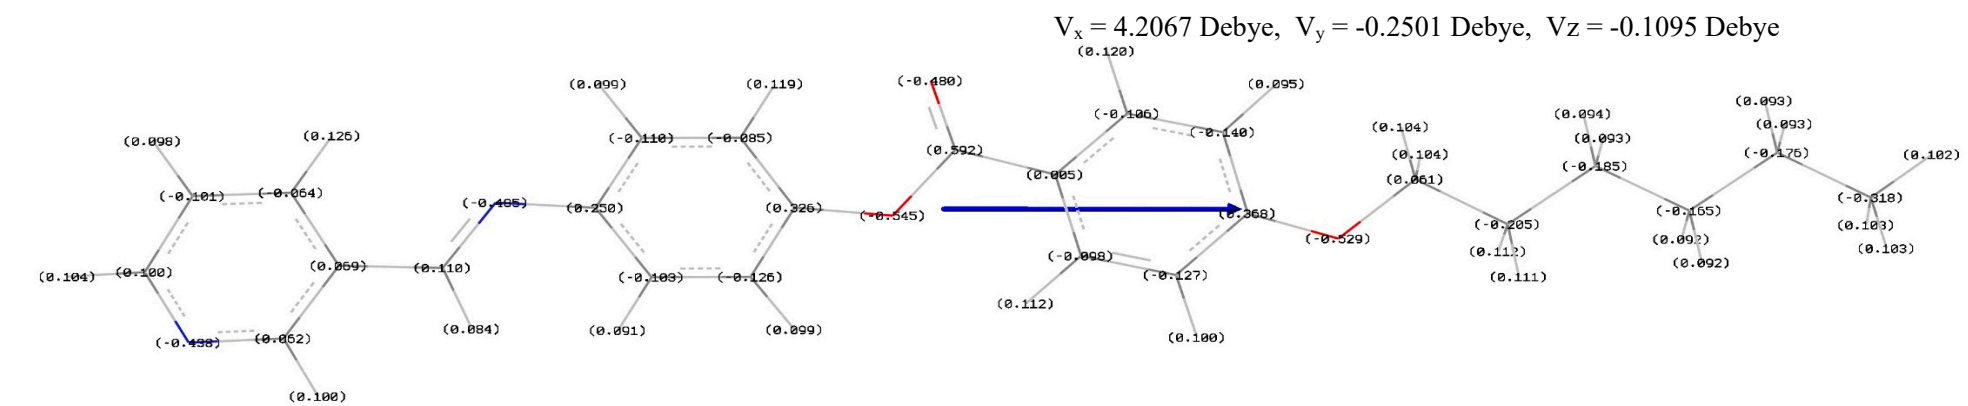

T6

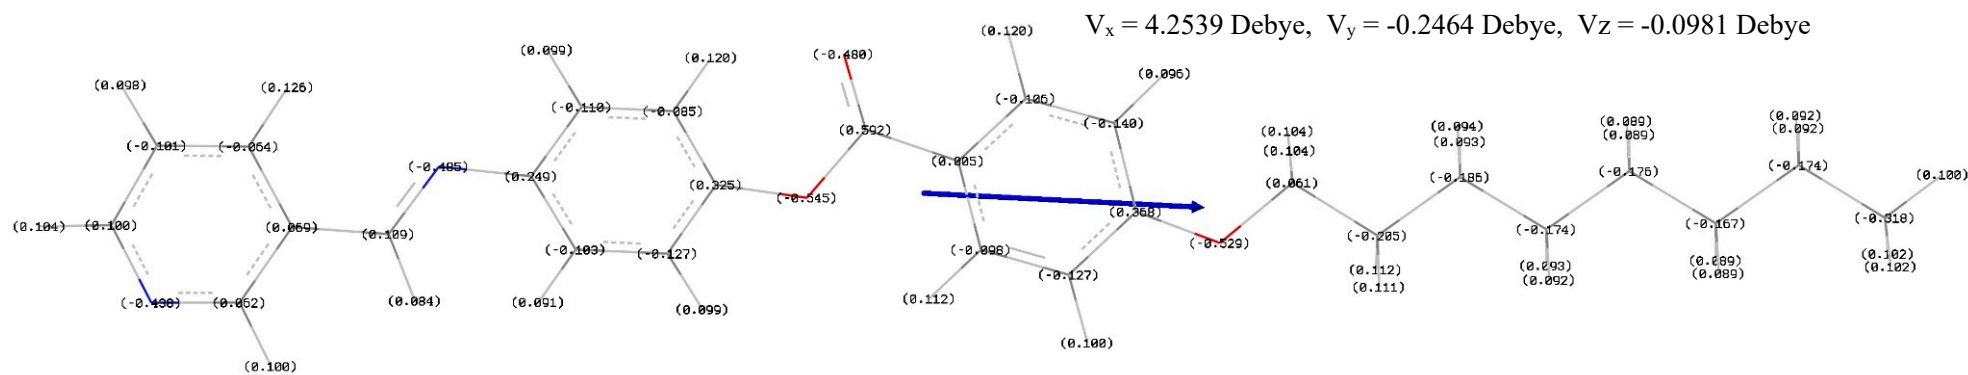

T8

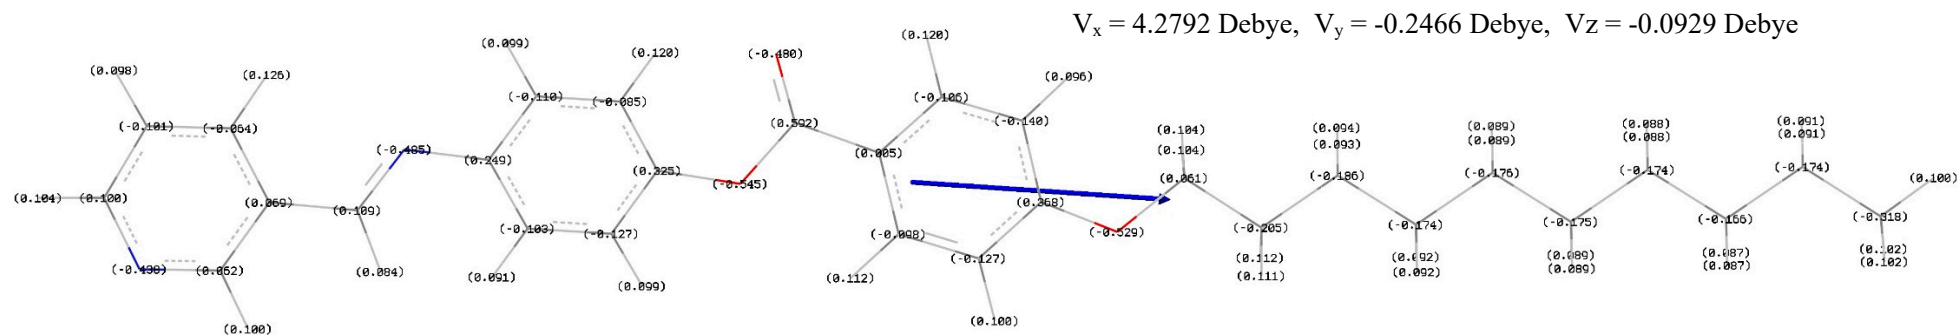

**T10**

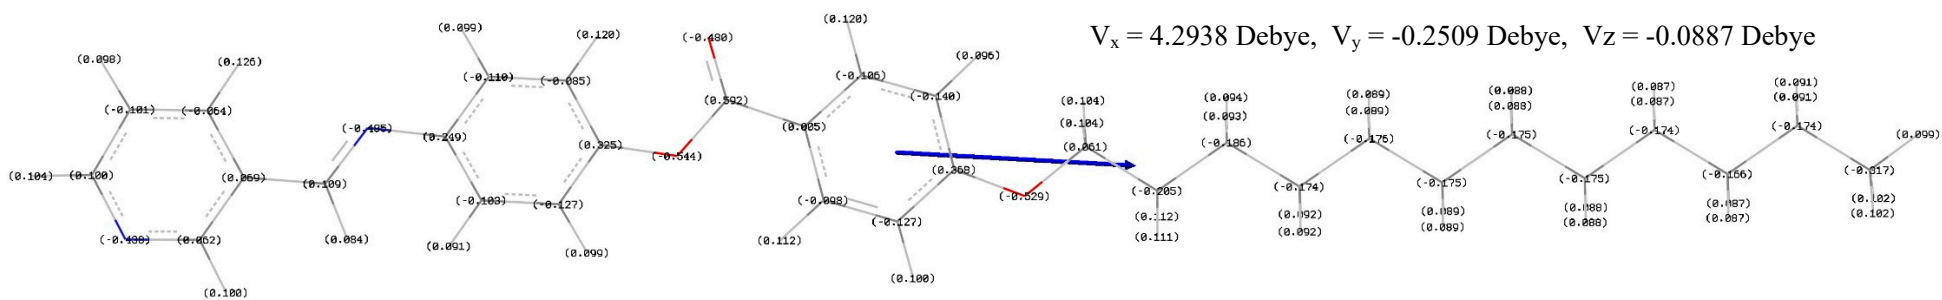

**T12**

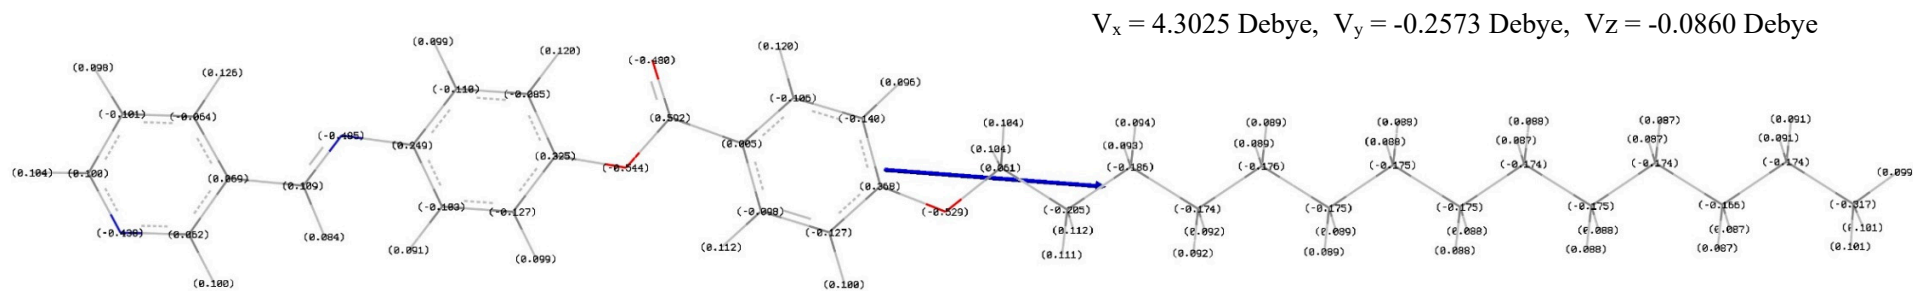

**T14**

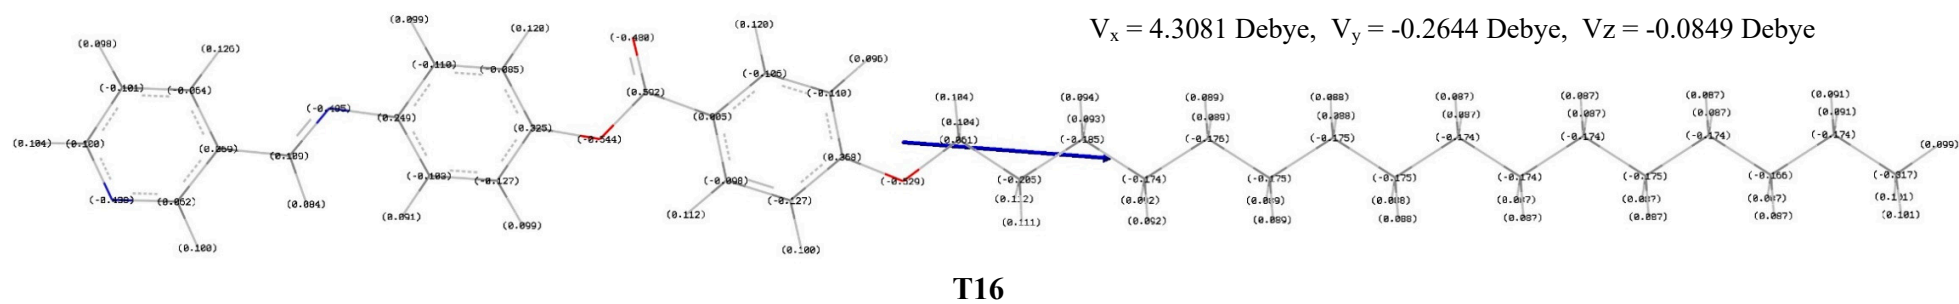

**Figure S6.** Atomic charges and dipole moment vectors, calculated at B3LYP/6-31G(d,p) level for the **T<sub>n</sub>** series
